# Supplementary material for: Integrated Resistance Analysis of CERTAIN-1 and CERTAIN-2 Studies in Hepatitis C Virus-Infected Patients Receiving Glecaprevir and Pibrentasvir in Japan
Source: PubMed Central journal article supplement (PMC5786793; doi:10.1128/aac.02217-17), 2018-01-25
Supplement: AAC.02217-17_zac002186878s1.pdf [file AAC.02217-17_zac002186878s1.pdf]

**Supplemental Table 1. Baseline Substitutions in NS3 and NS5A In DAA-Experienced GT1b-Infected Patients**

| Prior DAA treatments <sup>a</sup>                    | Months since failure with prior DAA regimen | HCV GT <sup>b</sup> | NS3 Substitutions at Baseline <sup>b,c</sup> | NS5A Substitutions at Baseline <sup>b,c</sup> |
|------------------------------------------------------|---------------------------------------------|---------------------|----------------------------------------------|-----------------------------------------------|
| Asunaprevir + Daclatasvir                            | 12.7                                        | 1b*                 | D168V                                        | P32L (<15%), P32deletion                      |
| Asunaprevir + Daclatasvir                            | 12.3                                        | 1b                  | None                                         | L31F + P32deletion                            |
| Asunaprevir + Daclatasvir                            | 8.5                                         | 1b                  | D168E                                        | L31M + Y93H                                   |
| Ombitasvir + Paritaprevir; Asunaprevir + Daclatasvir | 13.8                                        | 1b*                 | None                                         | L31M + Y93H                                   |
| Asunaprevir + Daclatasvir                            | 13.1                                        | 1b                  | D168E                                        | L31I (<15%), L31V, Y93H                       |
| Asunaprevir + Daclatasvir                            | 10.5                                        | 1b*                 | D168E                                        | L31V + Y93H                                   |
| Asunaprevir + Daclatasvir                            | 10.6                                        | 1b                  | None                                         | R30H + L31I + Y93H, R30Q (<15%), P58S (<15%)  |
| Asunaprevir + Daclatasvir                            | 12.5                                        | 1b                  | None                                         | Q24K + L28I + R30L + L31I, P58L               |
| Telaprevir; Simeprevir; Asunaprevir + Daclatasvir    | 14.5                                        | 1b                  | D168E                                        | L31M, L31V (<15%)                             |
| Telaprevir; Asunaprevir + Daclatasvir                | 12.5                                        | 1b                  | None                                         | Q24K + L28M + R30H + L31M                     |
| Telaprevir; Asunaprevir + Daclatasvir                | 11.9                                        | 1b                  | None                                         | Q24K + L28M + R30M + L31V + Y93H              |
| Asunaprevir + Daclatasvir                            | 6.7                                         | 1b*                 | None                                         | L31V + Y93H                                   |
| Asunaprevir + Daclatasvir                            | 11.2                                        | 1b                  | D168E                                        | L31M/V + Y93H                                 |
| Asunaprevir + Daclatasvir                            | 6.0                                         | 1b                  | NA                                           | L31M + Y93H                                   |
| Asunaprevir + Daclatasvir                            | 16.1                                        | 1b                  | None                                         | Q24K + L28V + L31M, R30H, R30Q (<15%)         |
| Telaprevir; Asunaprevir + Daclatasvir                | 6.4                                         | 1b                  | D168E                                        | L31V + Y93H                                   |
| Asunaprevir + Daclatasvir                            | 9.9                                         | 1b                  | None                                         | R30L + L31M + A92K                            |
| Asunaprevir + Daclatasvir                            | 11.5                                        | 1b                  | None                                         | None                                          |
| Asunaprevir + Daclatasvir                            | 13.6                                        | 1b                  | D168E                                        | L31V (<15%), L31M + Y93H                      |
| Asunaprevir + Daclatasvir                            | 12.9                                        | 1b                  | D168E                                        | L31M + Y93H                                   |
| Asunaprevir + Daclatasvir                            | 10.8                                        | 1b                  | None                                         | L31M, L31V, Y93H                              |
| Asunaprevir + Daclatasvir                            | 11.3                                        | 1b                  | None                                         | L31I + A92T + Y93H                            |
| Asunaprevir + Daclatasvir                            | 8.5                                         | 1b                  | D168E                                        | L31F                                          |
| Simeprevir; Asunaprevir + Daclatasvir                | 6.4                                         | 1b                  | D168E                                        | L31V + Y93H                                   |
| Asunaprevir + Daclatasvir                            | 11.1                                        | 1b                  | D168A (<15%)                                 | Q24K + L28M + R30H + Y93F                     |
| Simeprevir; Asunaprevir + Daclatasvir                | 7.8                                         | 1b                  | D168V                                        | R30Q + L31M + Y93H                            |
| Asunaprevir + Daclatasvir                            | 6.4                                         | 1b                  | D168T                                        | L31V + Y93H                                   |
| Asunaprevir + Daclatasvir                            | 9.6                                         | 1b                  | D168E                                        | Q24K + L28M + R30Q + A92T + Y93S              |
| Asunaprevir + Daclatasvir                            | 11.8                                        | 1b                  | None                                         | R30Q + L31F + Y93H                            |
| Simeprevir; Asunaprevir + Daclatasvir                | 4.7                                         | 1b                  | D168V                                        | Q24K + L31I, L28M/T, A92T, Y93H               |
| Simeprevir                                           | 19.3                                        | 1b                  | None                                         | A92T                                          |
| Simeprevir                                           | 11.7                                        | 1b                  | None                                         | Q24K + L28M + R30L + P58L                     |

- Prior treatment with IFN or RBV are not listed.
- Patients who experienced virologic failure are indicated by shading. \* indicates patients with compensated cirrhosis.
- Baseline substitutions detected at the 2% but not at the 15% threshold are indicated as “(<15%)”. For samples with multiple substitutions within a target, if individual substitutions were detected at ≥ 90% prevalence, they are considered to be linked and denoted by “+”, whereas if one or more of the substitutions was detected at <90% prevalence, the variants are separated by a comma.

- d. Amino acid positions for NS3/4A protease inhibitor class included in the analysis: 155, 156, and 168. Amino acid positions for NS5A inhibitor class included in the analysis: 24, 28, 29, 30, 31, 32, 58, 92, and 93.

**Supplemental Table 2. Comparison of SVR<sub>12</sub> rates in DAA-experienced Patients with or without Baseline Substitutions at 15% Detection Threshold**

| Target | HCV GT    | Baseline Polymorphism | G/P<br>12 Weeks           |              | P Value <sup>a</sup> |           |    |
|--------|-----------|-----------------------|---------------------------|--------------|----------------------|-----------|----|
|        |           |                       | % SVR <sub>12</sub> (n/N) |              |                      |           |    |
|        |           |                       | With BP                   | Without BP   |                      |           |    |
| NS3    | 1b        | Y56F                  | 83.3 (5/6)                | 96.0 (24/25) | 0.36                 |           |    |
|        |           | Q80K/L/R              | 90.9 (10/11)              | 95.0 (19/20) | 1.0                  |           |    |
|        |           | V107I                 | 100 (1/1)                 | 93.3 (28/30) | 1.0                  |           |    |
|        |           | S122G/T               | 100 (13/13)               | 88.9 (16/18) | 0.50                 |           |    |
|        |           | D168E/T/V             | 93.3 (14/15)              | 93.8 (15/16) | 1.0                  |           |    |
|        |           | V170I                 | 93.3 (14/15)              | 93.8 (15/16) | 1.0                  |           |    |
|        |           | Any                   | 92.6 (25/27)              | 100 (4/4)    | 1.0                  |           |    |
| NS5A   |           | Q24K                  | 100 (8/8)                 | 91.7 (22/24) | 1.0                  |           |    |
|        |           | L28I/M/T/V            | 100 (8/8)                 | 91.7 (22/24) | 1.0                  |           |    |
|        |           | R30H/L/M/Q            | 100 (11/11)               | 90.5 (19/21) | 0.53                 |           |    |
|        |           | L31F/I/M/V            | 96.2 (25/26)              | 83.3 (5/6)   | 0.35                 |           |    |
|        |           | P32deletion           | (0/2)                     | 100 (30/30)  | 0.002*               |           |    |
|        |           | Q54H/L                | 100 (9/9)                 | 91.3 (21/23) | 1.0                  |           |    |
|        |           | P58L                  | 100 (2/2)                 | 93.3 (28/30) | 1.0                  |           |    |
|        |           | Q62E/K/P              | 100 (3/3)                 | 93.1 (27/29) | 1.0                  |           |    |
|        |           | A92K/T                | 100 (5/5)                 | 92.6 (25/27) | 1.0                  |           |    |
|        |           | Y93F/H/S              | 100 (21/21)               | 81.8 (9/11)  | 0.11                 |           |    |
|        |           | Any                   | 93.5 (29/31)              | 100 (1/1)    | 1.0                  |           |    |
|        |           | NS3                   | 2a                        | Any          | --                   | 100 (1/1) | -- |
|        |           | NS5A                  |                           | T24A         | 100 (1/1)            | --        | -- |
| L31M   |           |                       |                           | 100 (1/1)    | --                   | --        |    |
| Any    | 100 (1/1) |                       |                           | --           | --                   |           |    |

a. P value by Fisher's exact test. \* indicates value is statistically significant at 0.01 level.

**Supplemental Figure 1. Prevalence of Baseline Polymorphisms in NS3 in DAA treatment-naïve GT1b-infected Patients in Japan, North America, Europe, and ROW**

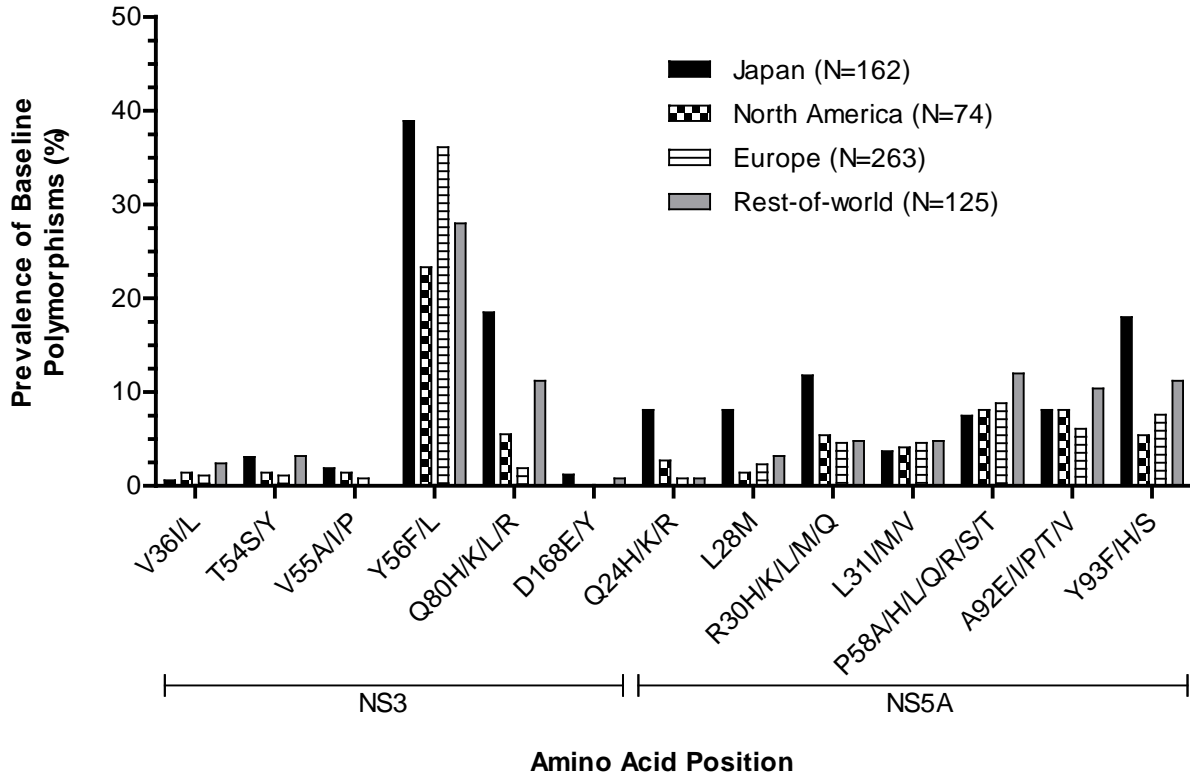

Prevalence of baseline polymorphisms at 15% detection threshold relative to GT1b-Con1 reference sequence at amino acid positions of interest for the NS3/4A protease inhibitor or NS5A inhibitor class is shown. When defining geographic regions, sites in Canada, Mexico, Puerto Rico and the United States were grouped under North America; sites in Austria, Belgium, France, Germany, Greece, Hungary, Italy, Lithuania, Poland, Portugal, Romania, Spain, Sweden, Switzerland, and United Kingdom were grouped under Europe; sites in Australia, Chile, Israel, Korea, New Zealand, South Africa, and Taiwan were grouped together as rest of world (ROW).

**Supplemental Figure 2. Prevalence of baseline polymorphisms in NS3 and NS5A in DAA treatment-naïve GT2-infected patients in Japan, North America, Europe, and ROW.**

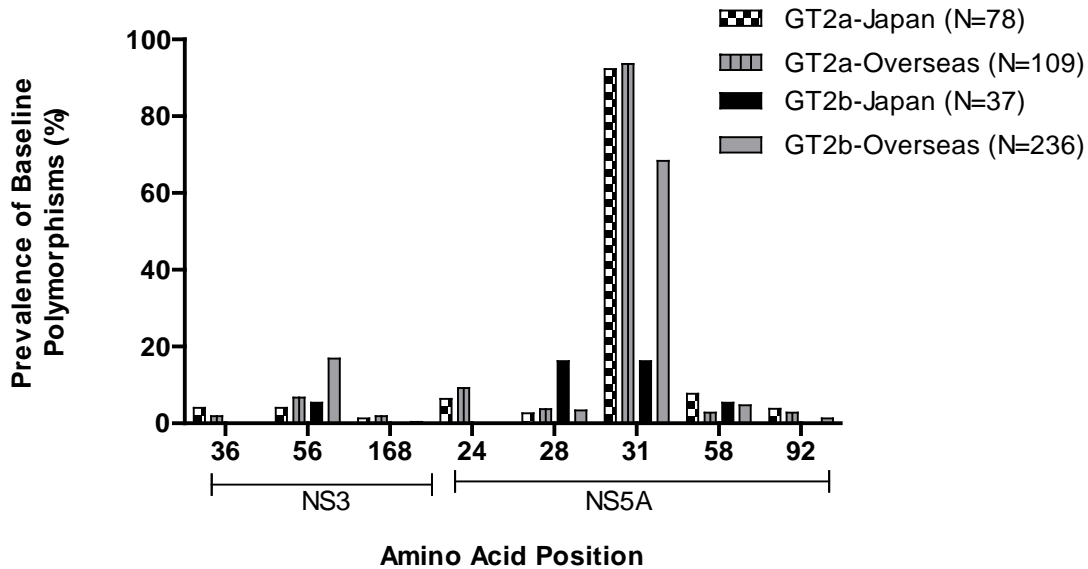

| GT | Strain | Amino Acids in Reference Strain at Positions of Interest in NS3 |    |    |    |    |    |     |     |     |
|----|--------|-----------------------------------------------------------------|----|----|----|----|----|-----|-----|-----|
|    |        | 36                                                              | 43 | 54 | 55 | 56 | 80 | 155 | 156 | 168 |
| 2a | JFH-1  | L                                                               | F  | T  | V  | Y  | G  | R   | A   | D   |
| 2b | HC-J8  | L                                                               | F  | T  | V  | Y  | G  | R   | A   | D   |

  

| GT | Strain | Amino Acids in Reference Strain at Positions of Interest in NS5A |    |    |    |    |    |    |   |
|----|--------|------------------------------------------------------------------|----|----|----|----|----|----|---|
|    |        | 24                                                               | 28 | 30 | 31 | 32 | 58 | 93 |   |
| 2a | JFH-1  | T                                                                | F  | K  | L  | P  | P  | C  | Y |
| 2b | HC-J8  | S                                                                | L  | K  | M  | P  | P  | C  | Y |

Prevalence of baseline polymorphisms at 15% detection threshold relative to GT2a-JFH-1 or GT2b-HC-J8 reference sequence at amino acid positions of interest for the NS3/4A protease or NS5A inhibitor class is shown. Overseas regions include North America, Europe and ROW. Amino acids at positions important for PI and NS5A inhibitor class are shown in the inset table. Baseline polymorphisms were not detected at positions 43, 54, 55, 155, 156 in NS3, or 30, 32, 93 in NS5A.
